# Supplementary material for: Alveolar antral artery: cone beam computed tomography study and clinical context
Source: PeerJ. 2023 Nov 30;11:e16439. doi: 10.7717/peerj.16439 (PMC10693819; doi:10.7717/peerj.16439)
Supplement: Supplemental Information 1 [file peerj-11-16439-s001.xlsx]

## Sheet: List 1
	Is AAA visible on CBCT?	patient sex	year of birth	Is sinus maxilaris visible enough?		Are both sinus maxillaris visible on the CBCT scan	Is AAA present bilateraly?		Distance of sinus floor to AAA in region p1	P2	M1	M2	canal dimension in high	bony canal width	sinus maxillaris wall width	distance of AAA to a hard palate level in region M1	P2	P1	missing teeth	distance of AAA and sinus floorin region P1	P2	M1		sinus type
	yes	woman	85	yes		yes	only R		1mm	4mm	5mm	6mm	1mm	0,5mm	1,5mm	2.8	2.7	9mm	16.15	0	2	3		N
	yes	woman	82	yes		no only L	L		0	10	6.7	7mm	0.75	0.75	1.3	3mm	2.7	non visible	26	impossible	8	7		A
	no	woman	64	yes		no only L
	-	woman	5	no
	no	man	8	yes		yes
	yes	woman	64	yes		yes	yes		5mm	6mm	12mm	0	0.5	0.5		3,5mm	4mm	4mm	edentolous	impossible	9	5		A
	yes	woman
	yes	woman
	yes	woman	70	partialy		yes	yes		6mm	5.2	6mm	10	0.7	0.9	4.2	0,7mm	3,1mm	9mm	0
	artefacts	man	63	no
	yes	woman	10	yes		yes	no		9,6mm				0.8		3.9			13.4		9.4				W
	yes	man	91	yes		yes	yes		4.1	5	12.9	10.4	1.1	1.1	2.2	2.8	9.5	18.8	24,25,26	0	3	7.8		N
	yes	woman	79	yes		no	impossible		3.7	3.4	8.4	9.7	0.75	0.6	5mm	-1.6	-2.5	2.7	P2,M1
	-	man	70	no
	-	woman	75	no
	no	woman	55	yes
	no	woman	90	yes
	no	man	5	yes
	no	man	5	yes
	no	woman	79	yes
	no	woman	77	yes
	yes	man	3	yes		yes	yes		0				1	1										A
	yes	woman	13	yes		yes	no		0	3mm	0mm	impossible	0.9	0.75	8mm	6mm	2.4	impossible		4	7	8		A
	yes	ano	74	yes		yes	no - only L		0	2.7	1mm	8mm	0.6	0.9	4mm	0mm	1mm	3mm		-	2	0		w
	-	woman	62	no		no
	-	woman	47	no		no
	-	man	67	no		no
	no	woman	76	yes		yes
	-	man	94	no		no
	yes	man	1	yes		yes	no - only L		0				1	-	2.6									N
	only foramen	woman	77	yes		no	impossible					5mm								2	4	4.5		A
	no	man	88	yes		no	impossible
	no	woman	11	yes		yes
	no	man	68	yes		no
	no	man	8	yes		yes
	yes, only M1 a M2	man	6	yes		yes					0mm	0mm		1.3	1.2	3mm				-	1.5	3.3		A
	yes	woman	6	yes		yes	yes		7	9.6	14.3	-	1.2	1.2	4.2	4.4	3.4	9		5	8	-		N
	no	woman	8	no
	no	woman	41	no
	yes	man	11	yes		yes	yes		0	impossible	0	2.29	0.75	0.75	1.35	7.35	0	0		impossible	impossible	1.5	2.4	A
	yes	woman	3	yes		yes	no, only L		3.09	4.9	7	10.15	0.9	0.5	0.81	0	-1.5	0		1.2	2.72	7.66	7.36	W
	yes	man	41	only R		no, only R	impossible		15.28	not present	not present	not present	0.6	0.5	0.81	not present	not present	9.6	17,16, 11, 21	8.25	not present	not present	not present	W
	yes	man	53	partialy		no, only L	impossible		impossible	3.04	impossible	impossible	0.6	impossible	1.05	impossible	2.4	nelze	4,15,16,17,27,26,25,24	nelze	3.46	impossible	impossible	A
	yes	man	8	partialy		only R	impossible		0	not present	3.23	not present	1.05	0.62	5.72		not present	not present		not present	not present	0.75	impossible	W
	yes	woman	9	no		yes	yes		not present	3.4	impossible	impossible	0.55	0.5	0.75	impossible	4.65	impossible		impossible	2.4	nelze	impossible	A
	no	woman	11	yes		yes
		woman	62	no		no
	yes	woman	65	yes		yes	yes,		not present	5.44	6.6	15.13	0.9	0.55	1.7	3.2	11	není zachycena	17	není zachyceno	R 3,4	5.6	11	A
																4.2	14.2				L 4,5	4.4	7
		man	6	no		no
	no	woman	8	yes		yes
	yes	woman	9	yes		yes	yes		not present	4.71	7.18	5.53	0.7	0.75	1.24	4.5	5.11	impossible		impossible	3.3	3.15	impossible	W
		man	92	no		no
	no	woman	7	yes		yes
		man	66	no		no
	yes	woman	8	yes		yes	yes		2.62	5.24	2.3	impossible	0.45	0.65	1.75	0	2.55	4.8		4.65	3.6	3	impossible	A
		man	7	no
	yes	woman	8	yes		yes	yes		6.45	11.11	13.45	impossible	0.9	0.8	1.14	4.35	8.55	13.05		4.5	7.2	9.45	impossible	N
		woman	75	no		no
		woman	95	no		no
	no	man	78	yes		yes	no
		woman	12	no		no
		man	83	no		no
		man	70	no		no
	yes	woman	4	yes		no	yes	jde vidět jen po tři
		woman	86	no
	yes	man	87	yes		yes	only L		7.9	2.87	10.3	10.53	0.9	0.9	0.75	1.35	1.05	6.6	48, 46, 38, 18, 24, 28	5.7	3.3	4.95		W
	yes	man	2007	yes		yes	only L		3.9	not visible	not visible	not visible	0.9	0.8	1.35	impossible	impossible	6.15	48,38, 28, 18	6	impossible	impossible		W
	yes	man	2003	yes		yes	yes		4.43	9.93	1.62	not visible	1.65	1.35	2.4	-0.62	1.51	5.26		2.7	4.95	6.15		N
	yes	woman	81	yes		yes	yes		4.36	17.43	not visible	not visible	1.25	1.35	0.6	impossible	17.71	15.9		3.15	9.45	impossible		W
	yes	woman	70	yes		yes	yes																	impossible
	impossible			no
	yes	woman	2003	yes		yes	yes		9.99	11.23	14.01	not visible	1.4	0.6	1.65	2.7	2.55	8.4	18, 28	4.8	7.2	9.75		N
	no	man	94	yes
	no	woman	51	yes
	no	woman	2006	yes
	yes	woman	1968	yes		no	CBCT only na pravou			impossible	4.04	8,39 - od M1 distálně lze vidět její průběh	0.6	0.62	2.34	2.4	impossible	impossible	impossible	impossible	impossible	1.81		N
	yes	man	2005	yes		yes	yes		12.01	12.41	not visible	not visible	0.62	1.5	0.62	impossible	2.1	4.65	18, 28, 38, 48	5.1	8.4	impossible		W
	impossible	man	1999	no
	yes	man	2012	yes		yes	only L		8.82	not visible	not visible	not visible	0.76	0.91	0.67	impossible	impossible	21.6	18, 28, 38, 48	6.3	impossible	impossible		W
	yes	man	1960	yes		yes	yes (L dvojkanálek)		7.78	9.5	7.25	5.52	0.8	1	2.72	0.6	2.4	9.8	, 38, 48	4.22	5.6	3.2		A
	impossible	woman	1975	no
	no	woman	1990	yes
	yes	woman	1973	yes		no			impossible	impossible	12.99	7.62	0.9	0.6	0.75	-3.16	impossible	impossible	impossible	impossible	impossible	8.85		A
	no	man	2007	yes
	yes	man	2008	yes		yes	only L		3.79	9.11	not visible	not visible	0.9	1.05	1.5	impossible	6.3	13.95	26	4.95	7.05	impossible		W
	yes	woman	1960	yes		yes	yes		not visible	8.38	97,17 dvojkanálek	10.4	0.75	0.75	1.2	1.2	1.2	impossible	24, 25, 28, 16, 18, 35, 38, 48	5.87	5.25	4.2		A
	no		7	no		yes
	no	woman	11	yes		yes
	yes, ale pouze v rozsahu jednoho zubu jako imprese	man	13	yes		yes	no		0mm	0mm	not visible	not visible	0.9	0.75	2mm	impossible	2mm	impossible
	no	woman	9	yes		yes
	no	woman	4	yes		yes
	yes	man	94	yes		no, only L	impossible		7mm	5	5	5	0.6	0.6	2,7mm	-3	-1	0mm
	no	man	91	yes		no, only L
	no	woman	5	yes		yes
	no	woman	14	yes		yes
	no	man	14	no,		not enough
	no	man	56	yes		no, only L
	yes,	woman	62	yes		no, only R	impossible		6mm	5mm	not visible	not visible	0.6	0.6	3mm	není vidět	1.7	5mm		5.2	5.2	-		W
	no	woman	76	yes		no, only R
	yes	woman	63	yes		no, only R	impossible		10	10	14, ale velké sklonění dutiny		0.7	1,2mm (v oblasti P2)		2.8	5.7	9mm	16	10	10	11		N
septum	yes	woman	69	yes		yes	L		7	6	13, ale sklon		0.6	0.6	1.6	0mm	0mm	2,8mm	16	11	12	12		N
	no	woman	7	yes		yes
	yes,	woman	46	yes		no, only R	R		4.2	4.8	not visible	not visible	1	1.2	2.7	není vidět	4.8	4.2		nelze	nelze	nelze		nelze
	yes	woman	5	yes		yes	yes, bilaterally		7	12	13 velký sklon dutin	not present	0.5	0.5	6, měřeno přes kořen	2	1	2		¨-	5	9		N
	yes	man	4	just R		no, only R	only R		5	11	11	13	0.9	0.7	4mm	0	0	11m		5	7	9		A
	no	woman	11	yes
	no	woman	1	yes
	no	man	9
	no	woman	6
	yes	woman	73	yes		yes	je bilaterally		3.8	4	8	15	0.6	0.7	0.8	1	0	2	17	2
	no	man	9	yes		yes
	impossible	woman	89	yes		yes
	no	woman	2	yes partialy		yes														2	4.2	10		N
	yes	man	75	yes partialy		yes	yes		-	8.1	11.7	impossible	0.8	0.8	3	5.8	6.4	-	-	-	3.8	6.8		A
	no	woman	5	yes		yes
	yes	woman	65	yes		no	impossible		11.5	13	11	13.4	0.8	0.8	3.4	3.2	4.6	9.6	15, 16	9.8	9.4	7.6		A
	yes	man	4	yes		yes	yes		3.3	6	8.9	not visible	1	0.8	8.9	5.4	2.2	5.8		2	4.2	2.6		W
	yes	man	5	yes		yes	yes		9.9	7.3	11.9	not visible	1.2	0.8	1.2	1	1.4	5.7		5	3.6	7		N
	no	woman	4	yes partialy		yes z části
	no	woman	99	no		only L	impossible
	yes	man	58	yes		only L	impossible		14.3	18.2	not visible	not visible	1.6	1.8	impossible	impossible	0	4.6	24. 26	9.4	11.8	impossible		impossible
	no	woman	57	yes		only R	impossible
	yes	man	10	yes		yes	yes		5.5	3.6	not visible	not visible	0.8	1	impossible	impossible	0	5		0	0	impossible		impossible
	no	woman	4	yes		yes
	yes	woman	60	partialy		z části	yes -																	impossible
	yes	woman	3	yes partialy		z části	yes		3.5	impossible	impossible	impossible	0.6	0.6	impossible	impossible	impossible	7.8						impossible
	no	woman	80	yes		yes
	no	woman	63	yes		no only R
	yes	man	31	yes		yes	yes		9.4	not visible	10.5	not visible	0.8	0.8	3	2	-	9.8	14, 15, 16, 17	7.8	impossible	4.8		W
	yes	woman	78	yes		no only R	impossible
	no	woman	5	yes partialy		no only R	impossible
	yes	woman	59	impossible		no only R	impossible			impossible	impossible	10.5	0.8	1	6.8	-	-	-		-	-	-		impossible
	yes	woman	58	yes partialy		yes	yes		4.2	4.6	not visible	not present	1	impossible	3.6	impossible	1.6	2.4	14, 15, 16, 17	2.4	2	impossible		A
	yes	woman	2004	yes		yes	yes		5.28	not visible	7.5	9.9	1.5	0.75	1.8	3.15	impossible	11.1	-	4.95	impossible	8.41		A
	yes	woman	1944	partialy		yes	only L		4.91	impossible	impossible	impossible	0.75	1.06	0.62	impossible	impossible	11.7		5.1	impossible	impossible		A
	no	woman	2005	yes		yes
	yes	man	1998	yes		yes	yes			12.76	14.54	20.96	0.9	1.6	1.6	4	12.82	impossible	36,37,38,46, 47, 48, 14, 16, 18, 26, 27, 28	impossible	8.4	10.8		W
	yes	woman	1996	yes		no only L	only L			not visible	17.07	not visible	1.06	0.75	1.65	16.8	impossible	impossible	)	impossible	impossible	14.1		W
	yes	woman	1985	yes		yes	only R		9.81	6.51	6.12	not visible	0.9	0.9	1.51	1.35	0.3	10.95	16,18,28, 36,38,48	4.35	3.6	3.15		W
	no	woman	53	partialy
	yes	woman	89	yes		yes	yes		4.88	6.88	7.32	10.43	1.28	1.05	1.97	8.55	3.18	7.05	45, 46, 47, 48, 34, 35, 36 37, 38, 12,15,18,24,25	2.4	2.2	8.1		N
	yes	woman	2007	yes		yes	only R			8.95	not visible	not visible	1.2	0.9	2.09	impossible	4.5	impossible	12.22	impossible	4.21	impossible		N
		woman	10	no		no
		man	3	no		no
		woman	5	yes		yes	yes		5.13	8.64	10.35	7.52	1.22	0.5	1.4	1.8	0	5.2		5.4	5.6	8.2		A
	yes	man	54	no		no
	no	woman	9	yes		yes
	yes	woman	3	yes		yes	yes		7.06	5.5	impossible	impossible	0.5	0.91	0.75	1.66	0.91	11.4		6.9	5.85	4.35		W
